# Supplementary material
Source: publisher figshare collection journal article supplement (https://frontiersin.figshare.com/ndownloader/files/26009585)
Supplement: Supplementary file [file 26009585]

Supplementary Table 6. Averaged relative concentrations of 64 volatile compounds across fermentation stages in Central and East Pennsylvania regions. SD, standard deviation. S, Stages of fermentation

| 64 core volatile compounds            | Central region                  |       |       |       |       |       |       |       |       |       |       |       |       |       |       |       |       |       |       |       |
|---------------------------------------|---------------------------------|-------|-------|-------|-------|-------|-------|-------|-------|-------|-------|-------|-------|-------|-------|-------|-------|-------|-------|-------|
|                                       | Average relative concentrations |       |       |       |       |       |       |       |       |       | SD    |       |       |       |       |       |       |       |       |       |
|                                       | S1                              | S2    | S3    | S4    | S5    | S6    | S7    | S8    | S9    | S10   | S1    | S2    | S3    | S4    | S5    | S6    | S7    | S8    | S9    | S10   |
| Butanal, 3-methyl-                    | 0.223                           | 0.168 | 0.136 | 0.120 | 0.093 | 0.093 | 0.050 | 0.029 | 0.026 | 0.023 | 0.252 | 0.124 | 0.064 | 0.088 | 0.044 | 0.040 | 0.039 | 0.009 | 0.006 | 0.007 |
| Butanoic acid, methyl ester           | 0.142                           | 0.159 | 0.094 | 0.070 | 0.050 | 0.017 | 0.000 | 0.000 | 0.000 | 0.000 | 0.087 | 0.116 | 0.103 | 0.103 | 0.081 | 0.038 | 0.000 | 0.000 | 0.000 | 0.000 |
| Isobutyl acetate                      | 0.104                           | 0.108 | 0.373 | 0.417 | 0.596 | 0.734 | 0.789 | 0.751 | 0.724 | 0.711 | 0.158 | 0.102 | 0.282 | 0.456 | 0.595 | 0.689 | 0.428 | 0.438 | 0.403 | 0.320 |
| Butanoic acid, ethyl ester            | 0.020                           | 0.063 | 0.287 | 0.631 | 1.122 | 1.471 | 1.167 | 1.496 | 1.919 | 1.807 | 0.017 | 0.038 | 0.253 | 0.745 | 1.078 | 1.239 | 0.730 | 1.142 | 1.651 | 1.535 |
| 3-Buten-2-ol, 2-methyl-               | 0.270                           | 0.394 | 0.253 | 0.223 | 0.164 | 0.056 | 0.016 | 0.020 | 0.027 | 0.028 | 0.306 | 0.612 | 0.372 | 0.314 | 0.255 | 0.070 | 0.013 | 0.015 | 0.022 | 0.018 |
| 2,3-Pentanedione                      | 0.025                           | 0.126 | 0.379 | 0.347 | 0.471 | 0.371 | 0.256 | 0.232 | 0.234 | 0.203 | 0.027 | 0.169 | 0.271 | 0.300 | 0.373 | 0.216 | 0.120 | 0.142 | 0.144 | 0.129 |
| Butanoic acid, 3-methyl-, ethyl ester | 0.004                           | 0.023 | 0.026 | 0.045 | 0.068 | 0.086 | 0.070 | 0.087 | 0.109 | 0.120 | 0.005 | 0.026 | 0.014 | 0.034 | 0.034 | 0.069 | 0.038 | 0.041 | 0.043 | 0.049 |
| Hexanal                               | 3.695                           | 2.445 | 1.766 | 2.219 | 0.937 | 0.895 | 0.026 | 0.017 | 0.011 | 0.007 | 7.260 | 4.309 | 1.828 | 2.838 | 1.819 | 1.855 | 0.057 | 0.031 | 0.018 | 0.011 |
| 1-Propanol, 2-methyl-                 | 1.232                           | 2.086 | 3.890 | 4.656 | 7.214 | 7.746 | 6.517 | 6.169 | 6.712 | 6.647 | 1.353 | 1.068 | 1.746 | 2.713 | 4.399 | 5.269 | 1.888 | 1.399 | 1.492 | 1.572 |
| Pentane, 1-(1-ethoxyethoxy)-          | 0.001                           | 0.008 | 0.087 | 0.158 | 0.364 | 0.418 | 0.476 | 0.198 | 0.134 | 0.120 | 0.001 | 0.016 | 0.114 | 0.129 | 0.458 | 0.341 | 0.576 | 0.188 | 0.120 | 0.153 |

|                               |        |        |        |        |        |        |        |        |        |        |       |       |        |        |        |        |        |        |        |        |
|-------------------------------|--------|--------|--------|--------|--------|--------|--------|--------|--------|--------|-------|-------|--------|--------|--------|--------|--------|--------|--------|--------|
| 1-Butanol, 3-methyl-, acetate | 0.597  | 1.184  | 6.331  | 12.237 | 16.321 | 21.501 | 21.253 | 24.086 | 24.243 | 24.211 | 0.770 | 0.961 | 6.530  | 13.697 | 18.830 | 21.867 | 5.721  | 9.003  | 9.558  | 8.288  |
| 1-Butanol                     | 0.038  | 0.095  | 0.082  | 0.100  | 0.128  | 0.171  | 0.161  | 0.158  | 0.182  | 0.191  | 0.035 | 0.065 | 0.056  | 0.045  | 0.089  | 0.126  | 0.094  | 0.094  | 0.078  | 0.099  |
| Acetyl valeryl                | 0.010  | 0.025  | 0.134  | 0.144  | 0.137  | 0.079  | 0.090  | 0.054  | 0.060  | 0.051  | 0.016 | 0.036 | 0.202  | 0.160  | 0.163  | 0.057  | 0.063  | 0.034  | 0.026  | 0.030  |
| Acetic acid, pentyl ester     | 0.004  | 0.007  | 0.015  | 0.014  | 0.010  | 0.011  | 0.013  | 0.020  | 0.014  | 0.012  | 0.006 | 0.006 | 0.008  | 0.009  | 0.004  | 0.011  | 0.017  | 0.026  | 0.019  | 0.016  |
| 2-Heptanone                   | 0.014  | 0.012  | 0.019  | 0.016  | 0.041  | 0.026  | 0.020  | 0.034  | 0.027  | 0.019  | 0.016 | 0.007 | 0.013  | 0.007  | 0.070  | 0.033  | 0.021  | 0.027  | 0.029  | 0.021  |
| Heptanal                      | 0.021  | 0.029  | 0.027  | 0.017  | 0.012  | 0.011  | 0.006  | 0.006  | 0.006  | 0.005  | 0.026 | 0.043 | 0.021  | 0.018  | 0.014  | 0.017  | 0.008  | 0.005  | 0.007  | 0.007  |
| Hexanoic acid, methyl ester   | 0.021  | 0.044  | 0.120  | 0.130  | 0.157  | 0.132  | 0.143  | 0.129  | 0.130  | 0.128  | 0.021 | 0.026 | 0.096  | 0.080  | 0.069  | 0.054  | 0.072  | 0.056  | 0.035  | 0.028  |
| D-Limonene                    | 0.000  | 0.000  | 0.000  | 0.000  | 0.000  | 0.000  | 0.000  | 0.000  | 0.008  | 0.000  | 0.000 | 0.000 | 0.000  | 0.000  | 0.000  | 0.000  | 0.000  | 0.000  | 0.019  | 0.000  |
| 1-Butanol, 3-methyl-          | 12.482 | 14.793 | 31.771 | 47.644 | 79.798 | 89.131 | 84.106 | 82.020 | 90.733 | 90.076 | 7.131 | 5.645 | 12.522 | 29.368 | 54.778 | 63.519 | 42.165 | 32.727 | 34.929 | 40.475 |
| Hexanoic acid, ethyl ester    | 0.066  | 0.216  | 5.643  | 9.546  | 17.224 | 16.811 | 21.774 | 23.743 | 23.482 | 21.925 | 0.131 | 0.183 | 9.517  | 14.598 | 15.248 | 13.532 | 10.502 | 18.050 | 15.268 | 10.942 |
| Benzocyclobutene              | 0.004  | 0.285  | 0.816  | 0.675  | 0.720  | 0.651  | 0.358  | 0.333  | 0.334  | 0.340  | 0.005 | 0.410 | 0.929  | 0.677  | 0.504  | 0.593  | 0.217  | 0.138  | 0.114  | 0.104  |
| Acetic acid, hexyl ester      | 0.121  | 0.254  | 0.724  | 0.864  | 0.889  | 0.780  | 1.629  | 1.835  | 1.480  | 1.397  | 0.111 | 0.257 | 0.599  | 0.777  | 0.777  | 0.320  | 1.487  | 1.607  | 1.450  | 1.230  |
| Acetoin                       | 0.183  | 0.222  | 0.431  | 0.271  | 0.134  | 0.175  | 0.080  | 0.036  | 0.048  | 0.060  | 0.261 | 0.173 | 0.265  | 0.329  | 0.092  | 0.191  | 0.139  | 0.046  | 0.060  | 0.066  |
| 1-Pentanol, 4-methyl-         | 0.006  | 0.017  | 0.055  | 0.084  | 0.113  | 0.151  | 0.174  | 0.169  | 0.189  | 0.186  | 0.003 | 0.011 | 0.063  | 0.104  | 0.134  | 0.148  | 0.109  | 0.096  | 0.109  | 0.114  |

|                              |        |        |        |        |        |        |        |        |        |        |       |        |        |        |        |        |        |        |        |        |
|------------------------------|--------|--------|--------|--------|--------|--------|--------|--------|--------|--------|-------|--------|--------|--------|--------|--------|--------|--------|--------|--------|
| 1-Pentanol, 3-methyl-        | 0.014  | 0.029  | 0.074  | 0.153  | 0.218  | 0.326  | 0.344  | 0.340  | 0.387  | 0.379  | 0.014 | 0.031  | 0.080  | 0.215  | 0.315  | 0.320  | 0.253  | 0.213  | 0.206  | 0.217  |
| Ethyl (S)-(-)-lactate        | 0.002  | 0.003  | 0.021  | 0.034  | 0.276  | 0.440  | 0.629  | 1.195  | 2.108  | 2.554  | 0.003 | 0.003  | 0.017  | 0.048  | 0.372  | 0.559  | 0.491  | 0.489  | 0.485  | 0.550  |
| Heptanoic acid, ethyl ester  | 0.008  | 0.003  | 0.040  | 0.068  | 0.502  | 0.562  | 0.733  | 1.000  | 1.127  | 1.411  | 0.018 | 0.003  | 0.028  | 0.078  | 0.596  | 0.504  | 0.858  | 1.431  | 1.713  | 2.426  |
| 2-Hexenoic acid, ethyl ester | 0.012  | 0.015  | 0.032  | 0.071  | 0.161  | 0.198  | 0.229  | 0.254  | 0.264  | 0.281  | 0.009 | 0.012  | 0.020  | 0.046  | 0.096  | 0.155  | 0.128  | 0.151  | 0.130  | 0.165  |
| 1-Hexanol                    | 15.130 | 21.373 | 23.242 | 17.572 | 13.772 | 13.613 | 6.799  | 6.389  | 6.686  | 6.757  | 6.361 | 16.215 | 19.478 | 11.020 | 9.398  | 11.156 | 3.092  | 3.165  | 3.288  | 3.630  |
| 1-Propanol, 3-ethoxy-        | 0.027  | 0.020  | 0.051  | 0.054  | 0.197  | 0.126  | 0.086  | 0.094  | 0.120  | 0.117  | 0.037 | 0.043  | 0.056  | 0.052  | 0.336  | 0.160  | 0.090  | 0.082  | 0.117  | 0.114  |
| 3-Hexen-1-ol, (Z)-           | 0.895  | 1.973  | 1.798  | 1.321  | 0.754  | 0.617  | 0.217  | 0.200  | 0.219  | 0.218  | 0.428 | 1.723  | 1.873  | 1.191  | 0.794  | 0.644  | 0.088  | 0.110  | 0.127  | 0.128  |
| Octanoic acid, methyl ester  | 0.005  | 0.023  | 0.174  | 0.240  | 0.363  | 0.381  | 0.438  | 0.407  | 0.421  | 0.420  | 0.008 | 0.030  | 0.226  | 0.281  | 0.321  | 0.364  | 0.217  | 0.246  | 0.202  | 0.208  |
| 2-Hexen-1-ol, (Z)-           | 0.458  | 0.921  | 0.690  | 0.658  | 0.426  | 0.305  | 0.059  | 0.044  | 0.052  | 0.054  | 0.337 | 1.272  | 0.944  | 1.020  | 0.771  | 0.535  | 0.055  | 0.043  | 0.046  | 0.051  |
| Acetic acid                  | 2.896  | 2.226  | 2.793  | 1.764  | 3.043  | 3.195  | 1.945  | 1.930  | 2.520  | 2.963  | 4.136 | 1.427  | 2.332  | 0.724  | 2.301  | 2.226  | 1.834  | 1.306  | 1.462  | 1.734  |
| Octanoic acid, ethyl ester   | 0.070  | 0.429  | 8.894  | 18.860 | 42.339 | 42.567 | 43.429 | 46.225 | 52.670 | 47.311 | 0.065 | 0.840  | 15.813 | 32.571 | 45.571 | 46.190 | 25.361 | 38.592 | 43.068 | 32.816 |
| Isopentyl hexanoate          | 0.005  | 0.009  | 0.076  | 0.148  | 0.292  | 0.315  | 0.265  | 0.249  | 0.261  | 0.233  | 0.011 | 0.017  | 0.145  | 0.280  | 0.376  | 0.378  | 0.201  | 0.174  | 0.131  | 0.099  |
| 1-Hexanol, 2-ethyl-          | 0.146  | 0.113  | 0.121  | 0.124  | 0.156  | 0.155  | 0.144  | 0.185  | 0.147  | 0.145  | 0.041 | 0.028  | 0.046  | 0.054  | 0.085  | 0.062  | 0.043  | 0.101  | 0.043  | 0.044  |
| cis-Hept-4-enol              | 0.003  | 0.013  | 0.026  | 0.026  | 0.032  | 0.038  | 0.036  | 0.034  | 0.038  | 0.037  | 0.003 | 0.014  | 0.018  | 0.016  | 0.021  | 0.022  | 0.019  | 0.019  | 0.019  | 0.017  |

|                                                  |       |       |       |       |        |        |        |        |        |        |       |       |       |        |        |        |        |        |        |        |
|--------------------------------------------------|-------|-------|-------|-------|--------|--------|--------|--------|--------|--------|-------|-------|-------|--------|--------|--------|--------|--------|--------|--------|
| 2,3-Butanediol, [R-(R*,R*)]-                     | 0.041 | 0.029 | 0.320 | 0.472 | 1.694  | 1.970  | 1.936  | 2.476  | 2.659  | 2.909  | 0.081 | 0.035 | 0.360 | 0.545  | 1.898  | 1.752  | 0.616  | 0.799  | 0.961  | 1.070  |
| Pentanoic acid, 2-hydroxy-4-methyl-, ethyl ester | 0.002 | 0.001 | 0.004 | 0.006 | 0.024  | 0.037  | 0.063  | 0.103  | 0.147  | 0.191  | 0.002 | 0.002 | 0.003 | 0.006  | 0.026  | 0.050  | 0.043  | 0.031  | 0.041  | 0.061  |
| Linalool                                         | 0.023 | 0.031 | 0.060 | 0.051 | 0.073  | 0.088  | 0.115  | 0.122  | 0.131  | 0.132  | 0.019 | 0.015 | 0.043 | 0.045  | 0.053  | 0.060  | 0.039  | 0.042  | 0.037  | 0.033  |
| Propanoic acid, 2-methyl-                        | 0.179 | 0.494 | 0.438 | 0.550 | 0.627  | 0.646  | 0.414  | 0.407  | 0.433  | 0.427  | 0.251 | 0.627 | 0.131 | 0.113  | 0.245  | 0.504  | 0.185  | 0.229  | 0.251  | 0.268  |
| 1-Octanol                                        | 0.074 | 0.093 | 0.243 | 0.206 | 0.331  | 0.383  | 0.478  | 0.498  | 0.535  | 0.567  | 0.092 | 0.082 | 0.270 | 0.258  | 0.301  | 0.325  | 0.191  | 0.188  | 0.181  | 0.177  |
| 2,3-Butanediol, [S-(R*,R*)]-                     | 0.039 | 0.016 | 0.080 | 0.092 | 0.484  | 0.454  | 0.491  | 0.701  | 0.855  | 0.971  | 0.079 | 0.024 | 0.070 | 0.103  | 0.697  | 0.428  | 0.226  | 0.341  | 0.453  | 0.523  |
| Propylene Glycol                                 | 0.001 | 0.001 | 0.003 | 0.010 | 0.052  | 0.075  | 0.058  | 0.078  | 0.098  | 0.106  | 0.002 | 0.002 | 0.002 | 0.011  | 0.059  | 0.073  | 0.018  | 0.019  | 0.026  | 0.038  |
| Decanoic acid, methyl ester                      | 0.000 | 0.002 | 0.082 | 0.074 | 0.215  | 0.167  | 0.152  | 0.142  | 0.166  | 0.149  | 0.001 | 0.003 | 0.140 | 0.115  | 0.226  | 0.179  | 0.093  | 0.118  | 0.116  | 0.098  |
| Butanoic acid                                    | 0.011 | 0.040 | 0.107 | 0.133 | 0.185  | 0.198  | 0.180  | 0.196  | 0.215  | 0.209  | 0.013 | 0.033 | 0.091 | 0.105  | 0.138  | 0.132  | 0.067  | 0.083  | 0.098  | 0.072  |
| Benzaldehyde, 4-methyl-                          | 0.148 | 0.143 | 0.239 | 0.221 | 0.338  | 0.278  | 0.301  | 0.284  | 0.330  | 0.355  | 0.046 | 0.085 | 0.073 | 0.120  | 0.281  | 0.158  | 0.133  | 0.148  | 0.155  | 0.165  |
| Decanoic acid, ethyl ester                       | 0.037 | 0.112 | 2.948 | 7.800 | 31.012 | 22.833 | 18.070 | 21.349 | 28.469 | 25.442 | 0.063 | 0.133 | 4.972 | 13.215 | 36.028 | 24.792 | 12.098 | 20.275 | 27.093 | 21.419 |
| Butanoic acid, 3-methyl-                         | 0.127 | 0.354 | 0.387 | 0.489 | 0.548  | 0.576  | 0.445  | 0.439  | 0.466  | 0.479  | 0.158 | 0.421 | 0.233 | 0.216  | 0.323  | 0.518  | 0.175  | 0.191  | 0.232  | 0.245  |
| Butanoic acid, 2-methyl-                         | 0.054 | 0.200 | 0.198 | 0.250 | 0.307  | 0.288  | 0.275  | 0.254  | 0.271  | 0.275  | 0.060 | 0.219 | 0.114 | 0.118  | 0.148  | 0.166  | 0.139  | 0.112  | 0.135  | 0.142  |
| Octanoic acid, 3-methylbutyl ester               | 0.004 | 0.005 | 0.102 | 0.230 | 0.503  | 0.588  | 0.497  | 0.507  | 0.614  | 0.548  | 0.008 | 0.008 | 0.195 | 0.411  | 0.623  | 0.735  | 0.373  | 0.488  | 0.521  | 0.365  |

[illegible]

|                                       | Average relative concentrations |       |       |       |        |        |        |        |        |        | SD    |       |       |       |       |       |       |       |       |       |
|---------------------------------------|---------------------------------|-------|-------|-------|--------|--------|--------|--------|--------|--------|-------|-------|-------|-------|-------|-------|-------|-------|-------|-------|
|                                       | S1                              | S2    | S3    | S4    | S5     | S6     | S7     | S8     | S9     | S10    | S1    | S2    | S3    | S4    | S5    | S6    | S7    | S8    | S9    | S10   |
| Butanal, 3-methyl-                    | 0.054                           | 0.101 | 0.102 | 0.095 | 0.083  | 0.054  | 0.039  | 0.027  | 0.027  | 0.023  | 0.021 | 0.063 | 0.058 | 0.060 | 0.035 | 0.028 | 0.017 | 0.011 | 0.009 | 0.006 |
| Butanoic acid, methyl ester           | 0.131                           | 0.116 | 0.086 | 0.041 | 0.012  | 0.020  | 0.013  | 0.016  | 0.020  | 0.024  | 0.116 | 0.119 | 0.076 | 0.036 | 0.013 | 0.021 | 0.014 | 0.011 | 0.014 | 0.021 |
| Isobutyl acetate                      | 0.030                           | 0.071 | 0.179 | 0.235 | 0.380  | 0.741  | 0.638  | 0.593  | 0.523  | 0.523  | 0.025 | 0.030 | 0.049 | 0.073 | 0.076 | 0.408 | 0.456 | 0.435 | 0.237 | 0.239 |
| Butanoic acid, ethyl ester            | 0.026                           | 0.028 | 0.045 | 0.073 | 0.310  | 1.072  | 0.948  | 0.840  | 0.864  | 0.893  | 0.038 | 0.034 | 0.035 | 0.058 | 0.362 | 0.534 | 0.435 | 0.338 | 0.271 | 0.238 |
| 3-Buten-2-ol, 2-methyl-               | 0.316                           | 0.256 | 0.128 | 0.058 | 0.035  | 0.034  | 0.033  | 0.033  | 0.038  | 0.038  | 0.262 | 0.220 | 0.112 | 0.055 | 0.023 | 0.023 | 0.014 | 0.014 | 0.018 | 0.018 |
| 2,3-Pentanedione                      | 0.005                           | 0.078 | 0.244 | 0.254 | 0.318  | 0.356  | 0.285  | 0.250  | 0.220  | 0.214  | 0.001 | 0.081 | 0.196 | 0.168 | 0.152 | 0.096 | 0.141 | 0.121 | 0.098 | 0.109 |
| Butanoic acid, 3-methyl-, ethyl ester | 0.000                           | 0.004 | 0.011 | 0.013 | 0.023  | 0.061  | 0.081  | 0.098  | 0.120  | 0.138  | 0.001 | 0.004 | 0.013 | 0.011 | 0.019 | 0.034 | 0.028 | 0.040 | 0.045 | 0.062 |
| Hexanal                               | 0.431                           | 0.226 | 0.321 | 0.154 | 0.008  | 0.019  | 0.001  | 0.001  | 0.001  | 0.001  | 0.516 | 0.342 | 0.539 | 0.263 | 0.013 | 0.037 | 0.002 | 0.002 | 0.001 | 0.002 |
| 1-Propanol, 2-methyl-                 | 0.451                           | 1.465 | 2.566 | 2.975 | 3.496  | 7.679  | 7.044  | 6.687  | 6.753  | 6.763  | 0.315 | 0.545 | 1.261 | 1.439 | 1.482 | 2.666 | 3.167 | 2.776 | 2.565 | 2.648 |
| Pentane, 1-(1-ethoxyethoxy)-          | 0.000                           | 0.000 | 0.003 | 0.070 | 0.185  | 0.460  | 0.266  | 0.134  | 0.086  | 0.062  | 0.000 | 0.000 | 0.006 | 0.104 | 0.162 | 0.068 | 0.161 | 0.096 | 0.072 | 0.055 |
| 1-Butanol, 3-methyl-, acetate         | 0.078                           | 0.217 | 1.417 | 4.938 | 10.021 | 27.196 | 21.796 | 20.113 | 19.593 | 19.856 | 0.059 | 0.132 | 0.352 | 3.407 | 1.671 | 9.634 | 7.240 | 6.285 | 5.409 | 4.223 |
| 1-Butanol                             | 0.032                           | 0.051 | 0.060 | 0.039 | 0.037  | 0.112  | 0.117  | 0.111  | 0.116  | 0.111  | 0.022 | 0.037 | 0.047 | 0.021 | 0.021 | 0.038 | 0.031 | 0.013 | 0.012 | 0.014 |

|                                   |       |        |        |        |        |        |        |        |        |        |       |       |       |        |        |        |        |        |        |        |
|-----------------------------------|-------|--------|--------|--------|--------|--------|--------|--------|--------|--------|-------|-------|-------|--------|--------|--------|--------|--------|--------|--------|
| Acetyl<br>valeryl                 | 0.003 | 0.006  | 0.042  | 0.214  | 0.328  | 0.107  | 0.078  | 0.056  | 0.046  | 0.034  | 0.003 | 0.006 | 0.035 | 0.277  | 0.273  | 0.082  | 0.071  | 0.046  | 0.042  | 0.029  |
| Acetic acid,<br>pentyl ester      | 0.001 | 0.011  | 0.006  | 0.009  | 0.015  | 0.017  | 0.013  | 0.011  | 0.012  | 0.011  | 0.002 | 0.014 | 0.005 | 0.011  | 0.019  | 0.013  | 0.008  | 0.008  | 0.010  | 0.009  |
| 2-<br>Heptanone                   | 0.005 | 0.046  | 0.044  | 0.061  | 0.077  | 0.053  | 0.043  | 0.038  | 0.035  | 0.031  | 0.004 | 0.053 | 0.046 | 0.055  | 0.093  | 0.062  | 0.049  | 0.045  | 0.041  | 0.042  |
| Heptanal                          | 0.001 | 0.013  | 0.010  | 0.004  | 0.002  | 0.001  | 0.001  | 0.001  | 0.000  | 0.000  | 0.003 | 0.012 | 0.010 | 0.007  | 0.004  | 0.002  | 0.001  | 0.001  | 0.001  | 0.001  |
| Hexanoic<br>acid, methyl<br>ester | 0.001 | 0.010  | 0.032  | 0.042  | 0.115  | 0.123  | 0.078  | 0.072  | 0.080  | 0.085  | 0.002 | 0.009 | 0.032 | 0.027  | 0.140  | 0.081  | 0.038  | 0.028  | 0.027  | 0.031  |
| D-<br>Limonene                    | 0.000 | 0.000  | 0.000  | 0.000  | 0.000  | 0.000  | 0.000  | 0.194  | 0.148  | 0.185  | 0.000 | 0.000 | 0.000 | 0.000  | 0.000  | 0.000  | 0.000  | 0.389  | 0.297  | 0.369  |
| 1-Butanol,<br>3-methyl-           | 3.287 | 11.558 | 22.020 | 28.469 | 40.603 | 90.325 | 82.037 | 76.819 | 81.874 | 81.389 | 2.647 | 2.381 | 9.950 | 20.460 | 24.365 | 19.050 | 21.372 | 20.533 | 17.859 | 22.137 |
| Hexanoic<br>acid, ethyl<br>ester  | 0.009 | 0.066  | 0.452  | 2.364  | 9.571  | 25.128 | 16.827 | 14.387 | 14.467 | 15.074 | 0.016 | 0.102 | 0.524 | 2.528  | 11.565 | 15.591 | 10.376 | 5.990  | 4.543  | 5.435  |
| Benzocyclo<br>butene              | 0.029 | 0.055  | 0.109  | 0.150  | 0.202  | 0.468  | 0.280  | 0.233  | 0.255  | 0.269  | 0.050 | 0.085 | 0.121 | 0.062  | 0.058  | 0.271  | 0.150  | 0.176  | 0.203  | 0.156  |
| Acetic acid,<br>hexyl ester       | 0.055 | 0.168  | 0.405  | 0.837  | 1.363  | 2.520  | 1.553  | 1.271  | 1.134  | 1.034  | 0.068 | 0.204 | 0.204 | 0.417  | 0.273  | 1.226  | 0.717  | 0.533  | 0.694  | 0.537  |
| Acetoin                           | 0.044 | 0.132  | 0.318  | 0.311  | 0.400  | 0.032  | 0.033  | 0.029  | 0.036  | 0.036  | 0.051 | 0.084 | 0.152 | 0.370  | 0.470  | 0.025  | 0.022  | 0.019  | 0.024  | 0.033  |
| 1-Pentanol,<br>4-methyl-          | 0.003 | 0.007  | 0.024  | 0.060  | 0.097  | 0.361  | 0.275  | 0.254  | 0.276  | 0.253  | 0.003 | 0.004 | 0.008 | 0.049  | 0.057  | 0.314  | 0.173  | 0.139  | 0.163  | 0.122  |
| 1-Pentanol,<br>3-methyl-          | 0.002 | 0.009  | 0.036  | 0.061  | 0.090  | 0.352  | 0.320  | 0.307  | 0.321  | 0.302  | 0.001 | 0.003 | 0.023 | 0.057  | 0.063  | 0.292  | 0.262  | 0.219  | 0.185  | 0.174  |
| Ethyl (S)-<br>(-)-lactate         | 0.002 | 0.000  | 0.035  | 0.073  | 0.092  | 0.235  | 0.323  | 0.604  | 0.817  | 1.088  | 0.004 | 0.000 | 0.058 | 0.115  | 0.113  | 0.166  | 0.324  | 0.889  | 1.237  | 1.684  |

|                                                  |        |        |        |        |        |        |        |        |        |        |       |        |       |       |        |        |        |        |        |       |
|--------------------------------------------------|--------|--------|--------|--------|--------|--------|--------|--------|--------|--------|-------|--------|-------|-------|--------|--------|--------|--------|--------|-------|
| Heptanoic acid, ethyl ester                      | 0.000  | 0.001  | 0.005  | 0.008  | 0.028  | 0.312  | 0.214  | 0.191  | 0.160  | 0.152  | 0.000 | 0.001  | 0.008 | 0.009 | 0.039  | 0.173  | 0.141  | 0.126  | 0.082  | 0.063 |
| 2-Hexenoic acid, ethyl ester                     | 0.000  | 0.002  | 0.003  | 0.003  | 0.013  | 0.153  | 0.139  | 0.139  | 0.154  | 0.161  | 0.001 | 0.002  | 0.004 | 0.002 | 0.013  | 0.127  | 0.092  | 0.072  | 0.100  | 0.095 |
| 1-Hexanol                                        | 13.434 | 21.145 | 21.712 | 14.972 | 13.181 | 7.582  | 6.576  | 6.139  | 6.009  | 5.774  | 6.045 | 10.852 | 8.899 | 9.207 | 9.482  | 2.775  | 1.591  | 1.243  | 1.369  | 1.122 |
| 1-Propanol, 3-ethoxy-                            | 0.005  | 0.017  | 0.043  | 0.038  | 0.134  | 0.151  | 0.126  | 0.104  | 0.097  | 0.093  | 0.007 | 0.015  | 0.040 | 0.042 | 0.193  | 0.194  | 0.166  | 0.130  | 0.121  | 0.117 |
| 3-Hexen-1-ol, (Z)-                               | 0.792  | 0.915  | 0.824  | 0.484  | 0.381  | 0.203  | 0.166  | 0.163  | 0.168  | 0.161  | 0.313 | 0.289  | 0.199 | 0.298 | 0.311  | 0.131  | 0.074  | 0.075  | 0.086  | 0.078 |
| Octanoic acid, methyl ester                      | 0.000  | 0.001  | 0.020  | 0.070  | 0.221  | 0.422  | 0.281  | 0.235  | 0.219  | 0.221  | 0.001 | 0.002  | 0.027 | 0.061 | 0.295  | 0.256  | 0.186  | 0.082  | 0.063  | 0.063 |
| 2-Hexen-1-ol, (Z)-                               | 0.486  | 0.517  | 0.519  | 0.261  | 0.176  | 0.049  | 0.033  | 0.031  | 0.027  | 0.027  | 0.246 | 0.232  | 0.268 | 0.154 | 0.105  | 0.018  | 0.010  | 0.009  | 0.009  | 0.010 |
| Acetic acid                                      | 0.579  | 1.343  | 2.136  | 1.701  | 1.646  | 3.168  | 3.160  | 3.271  | 3.338  | 3.944  | 1.002 | 1.109  | 0.646 | 0.913 | 1.108  | 1.784  | 2.314  | 2.569  | 2.791  | 3.712 |
| Octanoic acid, ethyl ester                       | 0.006  | 0.010  | 0.486  | 3.487  | 13.250 | 51.830 | 34.435 | 27.123 | 20.710 | 19.943 | 0.010 | 0.008  | 0.492 | 3.780 | 16.735 | 31.745 | 25.288 | 13.138 | 10.785 | 8.471 |
| Isopentyl hexanoate                              | 0.001  | 0.002  | 0.003  | 0.026  | 0.052  | 0.305  | 0.169  | 0.121  | 0.096  | 0.092  | 0.001 | 0.000  | 0.000 | 0.039 | 0.044  | 0.219  | 0.147  | 0.057  | 0.047  | 0.036 |
| 1-Hexanol, 2-ethyl-                              | 0.140  | 0.125  | 0.126  | 0.125  | 0.127  | 0.127  | 0.139  | 0.143  | 0.143  | 0.139  | 0.012 | 0.013  | 0.023 | 0.020 | 0.007  | 0.027  | 0.020  | 0.017  | 0.015  | 0.014 |
| cis-Hept-4-enol                                  | 0.001  | 0.006  | 0.021  | 0.025  | 0.031  | 0.047  | 0.053  | 0.052  | 0.051  | 0.052  | 0.002 | 0.006  | 0.012 | 0.010 | 0.019  | 0.028  | 0.029  | 0.024  | 0.020  | 0.019 |
| 2,3-Butanediol, [R-(R*,R*)]-                     | 0.002  | 0.017  | 0.075  | 0.245  | 0.694  | 3.638  | 2.346  | 2.363  | 2.460  | 2.004  | 0.004 | 0.015  | 0.090 | 0.273 | 0.741  | 2.619  | 1.341  | 1.012  | 0.891  | 0.550 |
| Pentanoic acid, 2-hydroxy-4-methyl-, ethyl ester | 0.001  | 0.002  | 0.002  | 0.003  | 0.012  | 0.034  | 0.077  | 0.118  | 0.162  | 0.197  | 0.002 | 0.003  | 0.003 | 0.002 | 0.012  | 0.026  | 0.034  | 0.056  | 0.057  | 0.060 |

|                                    |       |       |       |       |       |        |        |        |       |       |       |       |       |       |       |        |        |       |       |       |
|------------------------------------|-------|-------|-------|-------|-------|--------|--------|--------|-------|-------|-------|-------|-------|-------|-------|--------|--------|-------|-------|-------|
| Linalool                           | 0.007 | 0.014 | 0.023 | 0.052 | 0.066 | 0.099  | 0.110  | 0.104  | 0.097 | 0.102 | 0.006 | 0.010 | 0.006 | 0.033 | 0.031 | 0.017  | 0.015  | 0.025 | 0.028 | 0.026 |
| Propanoic acid, 2-methyl-          | 0.036 | 0.333 | 0.447 | 0.259 | 0.284 | 0.443  | 0.399  | 0.388  | 0.356 | 0.354 | 0.058 | 0.269 | 0.390 | 0.072 | 0.054 | 0.202  | 0.261  | 0.206 | 0.161 | 0.160 |
| 1-Octanol                          | 0.029 | 0.395 | 0.563 | 0.702 | 0.948 | 0.955  | 0.953  | 1.087  | 1.060 | 1.113 | 0.039 | 0.649 | 0.847 | 0.956 | 0.747 | 0.963  | 0.848  | 1.047 | 1.041 | 1.092 |
| 2,3-Butanediol, [S-(R*,R*)]-       | 0.006 | 0.011 | 0.016 | 0.044 | 0.103 | 0.988  | 0.615  | 0.712  | 0.796 | 0.722 | 0.010 | 0.015 | 0.014 | 0.048 | 0.071 | 0.628  | 0.299  | 0.254 | 0.238 | 0.438 |
| Propylene Glycol                   | 0.000 | 0.000 | 0.000 | 0.000 | 0.006 | 0.126  | 0.072  | 0.079  | 0.091 | 0.073 | 0.000 | 0.000 | 0.000 | 0.000 | 0.011 | 0.103  | 0.041  | 0.029 | 0.035 | 0.032 |
| Decanoic acid, methyl ester        | 0.001 | 0.002 | 0.007 | 0.018 | 0.081 | 0.240  | 0.149  | 0.111  | 0.088 | 0.078 | 0.001 | 0.001 | 0.004 | 0.011 | 0.109 | 0.115  | 0.107  | 0.074 | 0.070 | 0.060 |
| Butanoic acid                      | 0.002 | 0.017 | 0.035 | 0.039 | 0.073 | 0.124  | 0.128  | 0.133  | 0.144 | 0.153 | 0.001 | 0.006 | 0.023 | 0.027 | 0.052 | 0.070  | 0.034  | 0.061 | 0.077 | 0.085 |
| Benzaldehyde, 4-methyl-            | 0.119 | 0.155 | 0.204 | 0.225 | 0.261 | 0.301  | 0.306  | 0.304  | 0.279 | 0.261 | 0.037 | 0.023 | 0.046 | 0.040 | 0.081 | 0.110  | 0.075  | 0.091 | 0.040 | 0.066 |
| Decanoic acid, ethyl ester         | 0.000 | 0.030 | 0.160 | 0.867 | 5.072 | 24.886 | 16.740 | 12.808 | 8.878 | 7.964 | 0.000 | 0.053 | 0.226 | 0.853 | 7.083 | 15.243 | 13.642 | 8.683 | 7.885 | 6.895 |
| Butanoic acid, 3-methyl-           | 0.031 | 0.267 | 0.336 | 0.270 | 0.389 | 0.635  | 0.542  | 0.534  | 0.525 | 0.529 | 0.054 | 0.247 | 0.330 | 0.090 | 0.169 | 0.330  | 0.308  | 0.283 | 0.249 | 0.253 |
| Butanoic acid, 2-methyl-           | 0.005 | 0.077 | 0.134 | 0.199 | 0.256 | 0.443  | 0.365  | 0.379  | 0.374 | 0.383 | 0.009 | 0.044 | 0.090 | 0.195 | 0.173 | 0.164  | 0.187  | 0.224 | 0.223 | 0.245 |
| Octanoic acid, 3-methylbutyl ester | 0.001 | 0.001 | 0.001 | 0.047 | 0.129 | 0.585  | 0.369  | 0.271  | 0.192 | 0.163 | 0.000 | 0.001 | 0.001 | 0.074 | 0.130 | 0.472  | 0.347  | 0.165 | 0.158 | 0.142 |
| Butanedioic acid, diethyl ester    | 0.000 | 0.000 | 0.000 | 0.004 | 0.016 | 0.179  | 0.209  | 0.276  | 0.361 | 0.430 | 0.001 | 0.000 | 0.000 | 0.006 | 0.020 | 0.083  | 0.115  | 0.139 | 0.208 | 0.192 |
| Ethyl 9-decenoate                  | 0.000 | 0.001 | 0.004 | 0.017 | 0.045 | 0.361  | 0.295  | 0.230  | 0.127 | 0.110 | 0.001 | 0.001 | 0.004 | 0.018 | 0.043 | 0.395  | 0.397  | 0.292 | 0.070 | 0.062 |

|                                                                  |       |       |       |       |        |        |        |        |        |        |       |       |       |        |        |        |        |        |        |        |
|------------------------------------------------------------------|-------|-------|-------|-------|--------|--------|--------|--------|--------|--------|-------|-------|-------|--------|--------|--------|--------|--------|--------|--------|
| 1-Propanol, 3-(methylthio)-                                      | 0.000 | 0.012 | 0.106 | 0.184 | 0.274  | 0.683  | 0.549  | 0.475  | 0.502  | 0.489  | 0.000 | 0.018 | 0.025 | 0.060  | 0.051  | 0.224  | 0.188  | 0.176  | 0.207  | 0.142  |
| 1,2-Cyclopentanedione                                            | 0.398 | 0.224 | 0.329 | 0.247 | 0.100  | 1.365  | 1.371  | 1.190  | 1.044  | 0.989  | 0.521 | 0.041 | 0.121 | 0.105  | 0.012  | 0.856  | 1.150  | 0.728  | 0.777  | 0.390  |
| Acetic acid, 2-phenylethyl ester                                 | 0.008 | 0.018 | 0.132 | 1.006 | 1.900  | 3.737  | 2.863  | 2.690  | 2.096  | 2.018  | 0.008 | 0.018 | 0.108 | 1.116  | 1.241  | 1.895  | 2.054  | 1.696  | 1.139  | 1.070  |
| 2-Buten-1-one, 1-(2,6,6-trimethyl-1,3-cyclohexadien-1-yl)-, (E)- | 0.086 | 0.096 | 0.091 | 0.107 | 0.123  | 0.078  | 0.108  | 0.125  | 0.140  | 0.146  | 0.056 | 0.068 | 0.058 | 0.034  | 0.022  | 0.012  | 0.043  | 0.056  | 0.059  | 0.064  |
| Hexanoic acid                                                    | 0.027 | 0.159 | 0.369 | 0.450 | 1.050  | 1.430  | 1.306  | 1.278  | 1.337  | 1.375  | 0.024 | 0.163 | 0.347 | 0.265  | 1.262  | 0.873  | 0.705  | 0.596  | 0.508  | 0.528  |
| Dodecanoic acid, ethyl ester                                     | 0.007 | 0.010 | 0.026 | 0.147 | 0.768  | 3.647  | 2.367  | 1.821  | 1.314  | 1.199  | 0.006 | 0.006 | 0.014 | 0.173  | 1.029  | 1.858  | 1.767  | 1.336  | 1.124  | 1.116  |
| Benzyl alcohol                                                   | 0.003 | 0.012 | 0.019 | 0.018 | 0.024  | 0.043  | 0.043  | 0.040  | 0.039  | 0.041  | 0.004 | 0.011 | 0.016 | 0.015  | 0.021  | 0.020  | 0.020  | 0.020  | 0.016  | 0.013  |
| Phenylethyl Alcohol                                              | 0.025 | 0.120 | 1.184 | 8.240 | 11.796 | 39.496 | 35.404 | 32.381 | 32.152 | 33.001 | 0.043 | 0.163 | 0.597 | 12.348 | 10.455 | 13.023 | 11.608 | 11.984 | 10.221 | 13.604 |
| Heptanoic acid                                                   | 0.003 | 0.010 | 0.011 | 0.012 | 0.013  | 0.011  | 0.011  | 0.011  | 0.010  | 0.012  | 0.003 | 0.009 | 0.010 | 0.011  | 0.012  | 0.013  | 0.011  | 0.013  | 0.012  | 0.014  |
| (E)-2-Hexenoic acid                                              | 0.014 | 0.035 | 0.021 | 0.011 | 0.009  | 0.000  | 0.000  | 0.000  | 0.001  | 0.001  | 0.018 | 0.043 | 0.019 | 0.010  | 0.011  | 0.000  | 0.000  | 0.000  | 0.002  | 0.003  |
